# Supplementary material
Source: PubMed Central journal article supplement (PMC4744113)
Supplement: NIHMS736993-supplement-2.pdf [file NIHMS736993-supplement-2.pdf]

Supplementary Table 1: List of ASOs

| ASO name           | Sequence               | Target gene         | Length       |
|--------------------|------------------------|---------------------|--------------|
| H-38               | GCAGCTTGTCACAGT        | <i>HBB</i>          | 15mer        |
| H-37               | TGCAGCTTGTCACAG        | <i>HBB</i>          | 15mer        |
| H-36               | GTGCAGCTTGTCACA        | <i>HBB</i>          | 15mer        |
| H-35               | CGTGCAGCTTGTCAC        | <i>HBB</i>          | 15mer        |
| H-34               | ACGTGCAGCTTGTC         | <i>HBB</i>          | 15mer        |
| H-33               | CACGTGCAGCTTGTC        | <i>HBB</i>          | 15mer        |
| H-32               | CCACGTGCAGCTTGT        | <i>HBB</i>          | 15mer        |
| H-31               | TCCACGTGCAGCTTG        | <i>HBB</i>          | 15mer        |
| H-30               | ATCCACGTGCAGCTT        | <i>HBB</i>          | 15mer        |
| H-29               | GATCCACGTGCAGCT        | <i>HBB</i>          | 15mer        |
| H-28               | GGATCCACGTGCAGC        | <i>HBB</i>          | 15mer        |
| H-27               | AGGATCCACGTGCAG        | <i>HBB</i>          | 15mer        |
| H-26               | CAGGATCCACGTGCA        | <i>HBB</i>          | 15mer        |
| H-25               | TCAGGATCCACGTGC        | <i>HBB</i>          | 15mer        |
| <b>H-24</b>        | <b>CTCAGGATCCACGTG</b> | <b><i>HBB</i></b>   | <b>15mer</b> |
| H-23               | TCTCAGGATCCACGT        | <i>HBB</i>          | 15mer        |
| H-22               | TTCTCAGGATCCACG        | <i>HBB</i>          | 15mer        |
| H-21               | GTTCTCAGGATCCAC        | <i>HBB</i>          | 15mer        |
| H-20               | AGTTCTCAGGATCCA        | <i>HBB</i>          | 15mer        |
| M-38               | CCCAGCAGAGCGGCC        | <i>MECP2</i>        | 15mer        |
| M-37               | TCCCAGCAGAGCGGC        | <i>MECP2</i>        | 15mer        |
| M-36               | TTCCCAGCAGAGCGG        | <i>MECP2</i>        | 15mer        |
| M-35               | CTTCCCAGCAGAGCG        | <i>MECP2</i>        | 15mer        |
| M-34               | ACTTCCCAGCAGAGC        | <i>MECP2</i>        | 15mer        |
| <b>M-33</b>        | <b>TACTTCCCAGCAGAG</b> | <b><i>MECP2</i></b> | <b>15mer</b> |
| M-32               | ATACTTCCCAGCAGA        | <i>MECP2</i>        | 15mer        |
| M-31               | CATACTTCCCAGCAG        | <i>MECP2</i>        | 15mer        |
| M-30               | TCATACTTCCCAGCA        | <i>MECP2</i>        | 15mer        |
| M-29               | ATCATACTTCCCAGC        | <i>MECP2</i>        | 15mer        |
| M-28               | CATCATACTTCCCAG        | <i>MECP2</i>        | 15mer        |
| M-28               | ACATCATACTTCCCA        | <i>MECP2</i>        | 15mer        |
| M-27               | CACATCATACTTCCC        | <i>MECP2</i>        | 15mer        |
| M-26               | ACACATCATACTTCC        | <i>MECP2</i>        | 15mer        |
| M-25               | TACACATCATACTTC        | <i>MECP2</i>        | 15mer        |
| M-24               | ATACACATCATACTT        | <i>MECP2</i>        | 15mer        |
| M-23               | AATACACATCATACT        | <i>MECP2</i>        | 15mer        |
| M-22               | AAATACACATCATA         | <i>MECP2</i>        | 15mer        |
| M-21               | CAAATACACATCATA        | <i>MECP2</i>        | 15mer        |
| <b>Control ASO</b> | <b>CATATTTCTTGATCA</b> | <b><i>CFTR</i></b>  | <b>15mer</b> |

Supplementary Table 2: List of primers

| <b>Primer name</b> | <b>Sequence</b>                               | <b>Target</b>       |
|--------------------|-----------------------------------------------|---------------------|
| HBB-F              | TGCATCTGACTCCTGAGGAGAA                        | <i>HBB</i> Exon 1   |
| HBB-R              | GTGATACTTGTGGGCCAGGGCAT                       | <i>HBB</i> Exon 3   |
| ACTB-F             | AGAGCTACGAGCTGCCTGAC                          | <i>ACTB</i> Exon 4  |
| ACTB-R             | AGCACTGTGTTGGCGTACAG                          | <i>ACTB</i> Exon 5  |
| GFP-F              | GTGACCGCTGCTGGGATC                            | <i>GFP</i>          |
| MECP2-R            | GCATCTTGACAAGGAGCTTC                          | <i>MECP2</i> Exon 4 |
| T7HBB-Ex2-F        | AATTTAATACGACTCACTATAGGGGCTGCTGGTGGTCTACCCTTG | <i>HBB</i> Exon 2   |
| HBB-Ex3-R          | TTAGTGATACTTGTGGGCCAGGGCA                     | <i>HBB</i> Exon 3   |
